# Supplementary material
Source: PubMed Central journal article supplement (PMC4703321)
Supplement: NIHMS745629-supplement-supplement_1.pdf [file NIHMS745629-supplement-supplement_1.pdf]

**A**

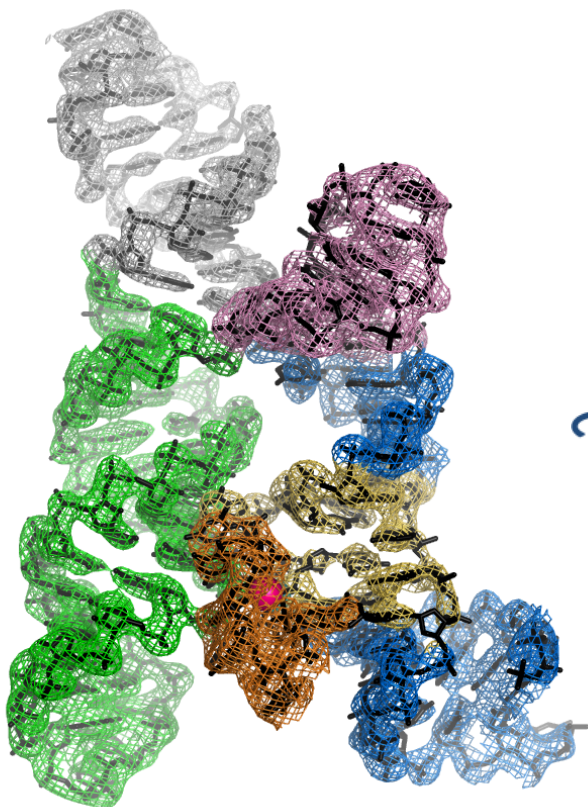

**B**

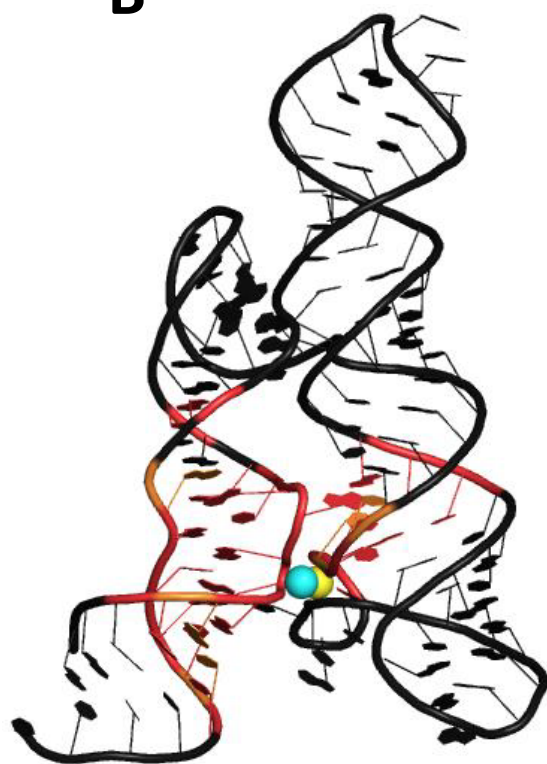

**C**

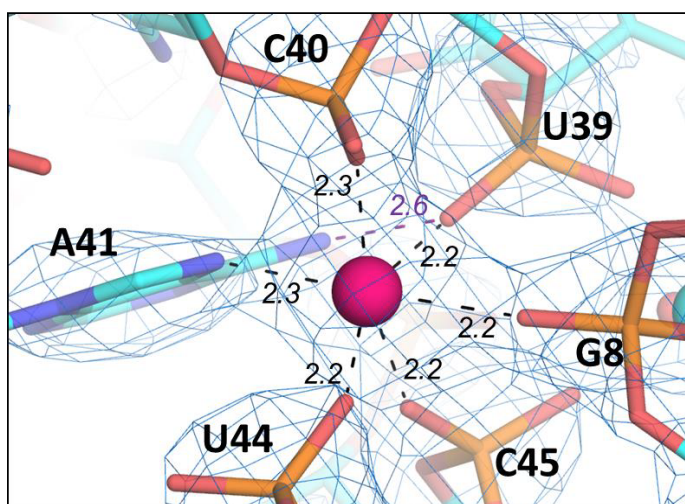

**D**

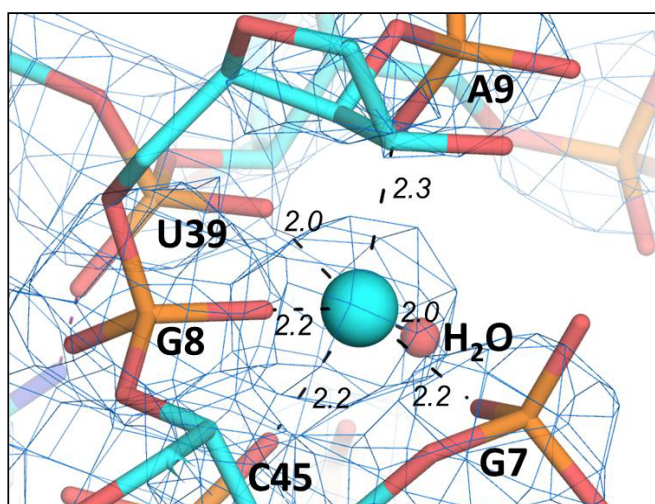

**E**

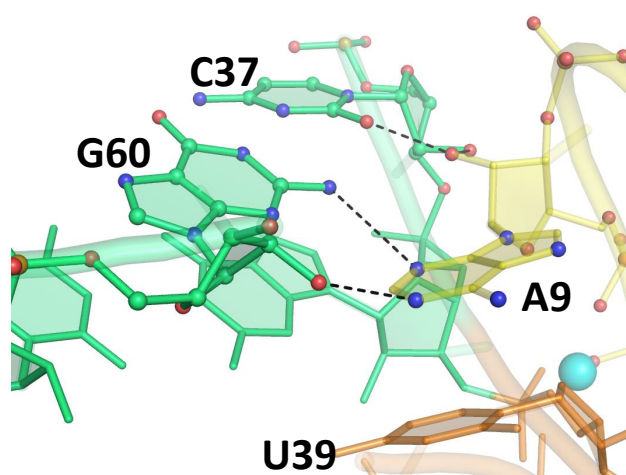

**A**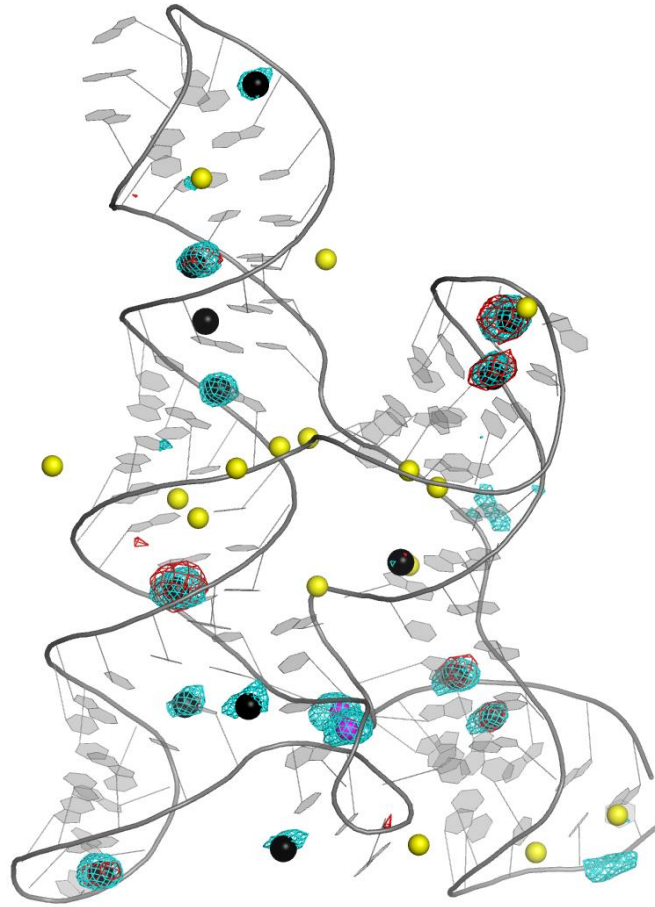**B**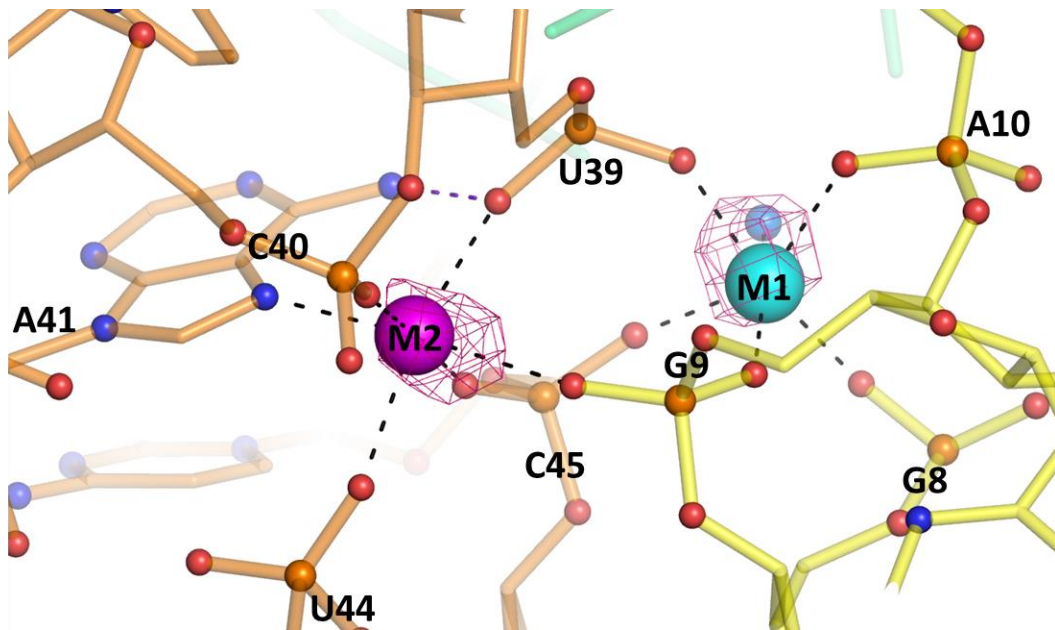

**A**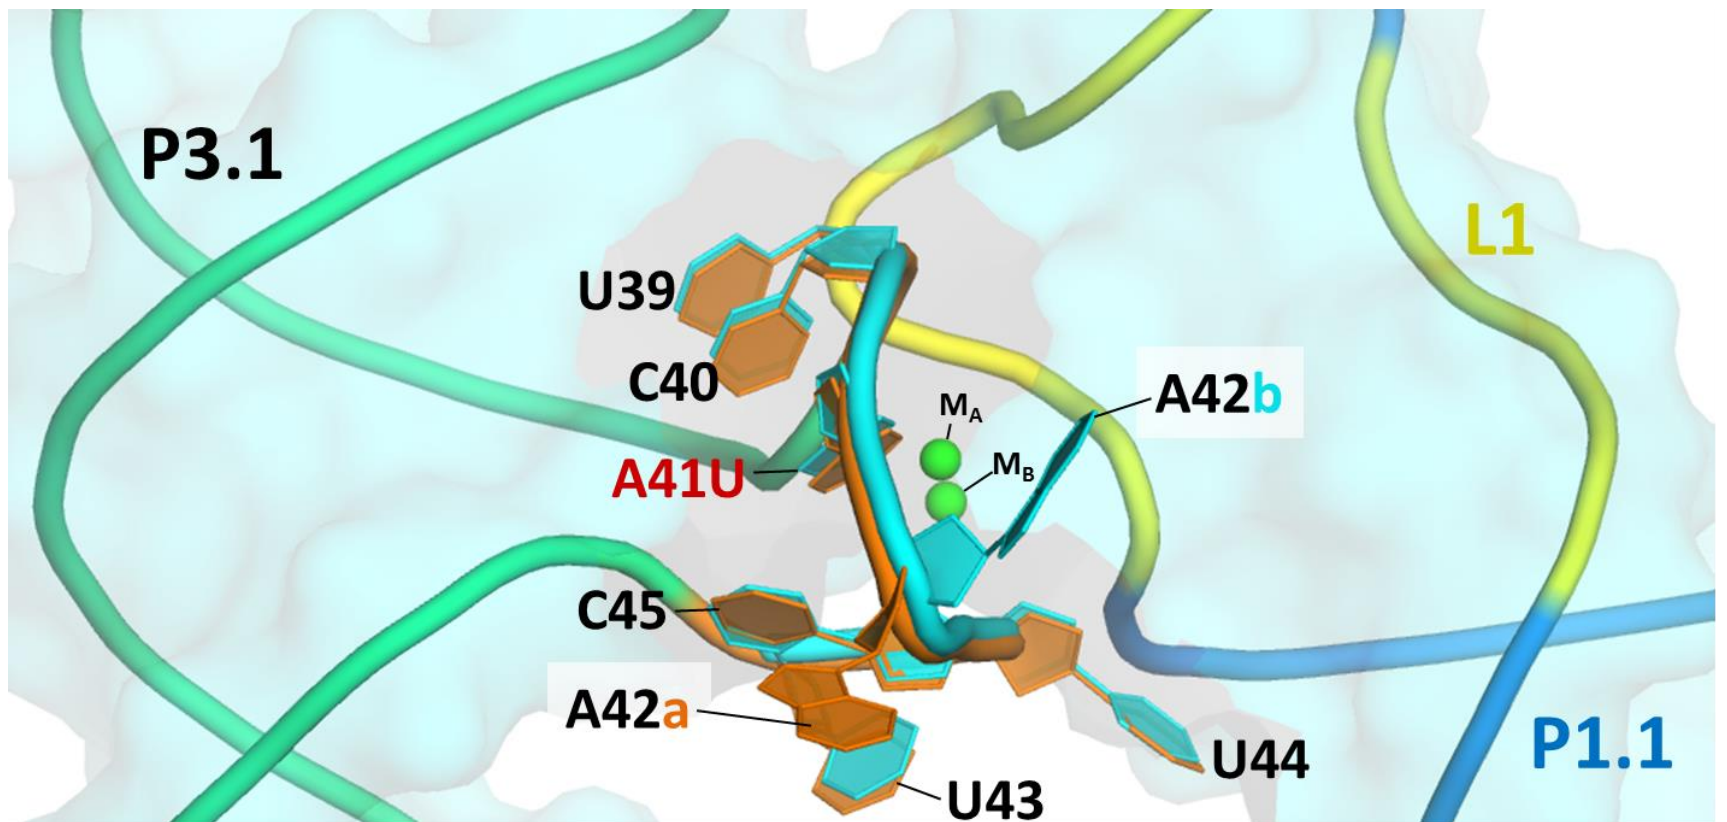**B**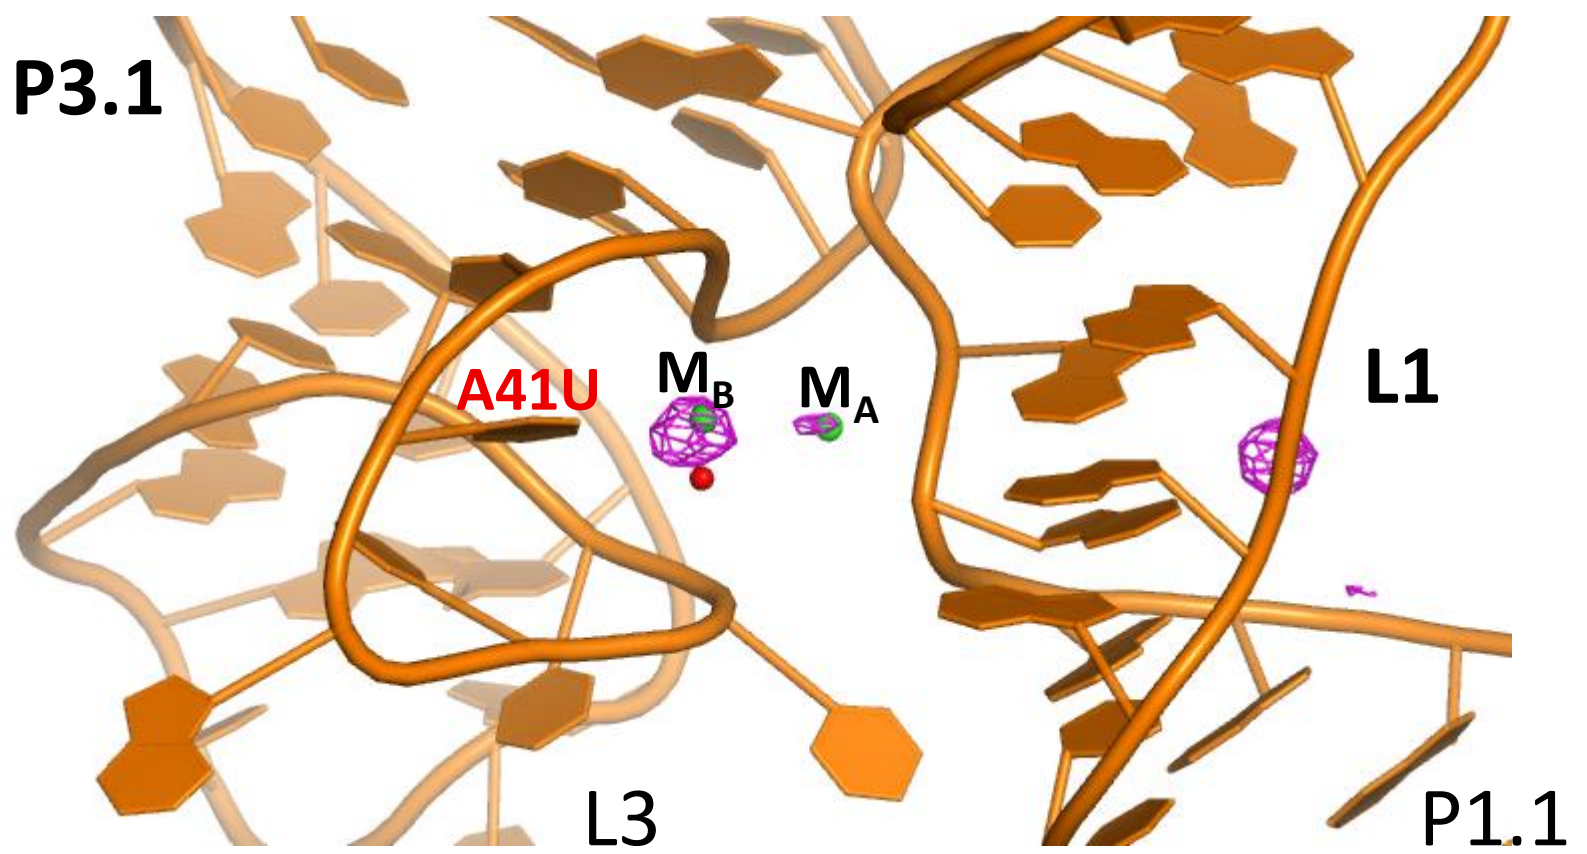

Figure S4.

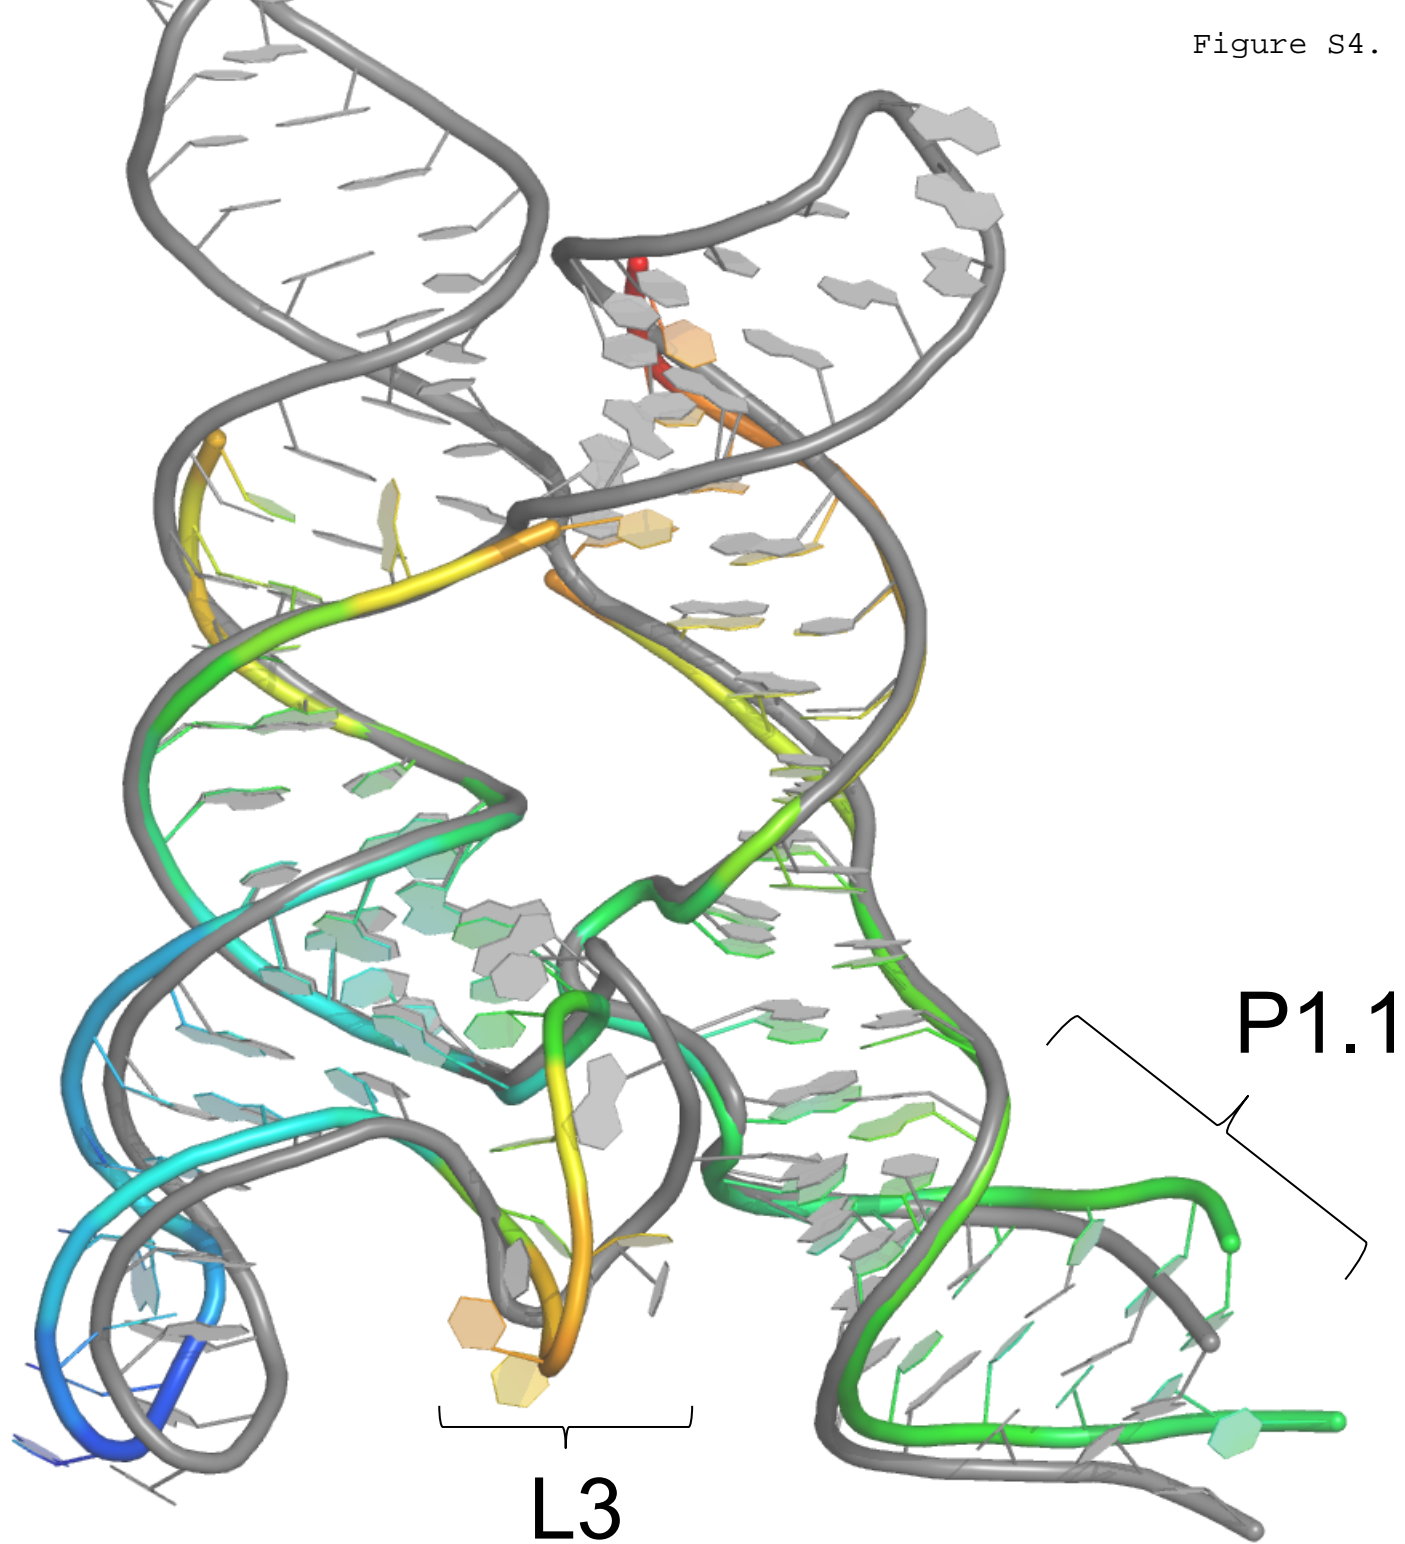

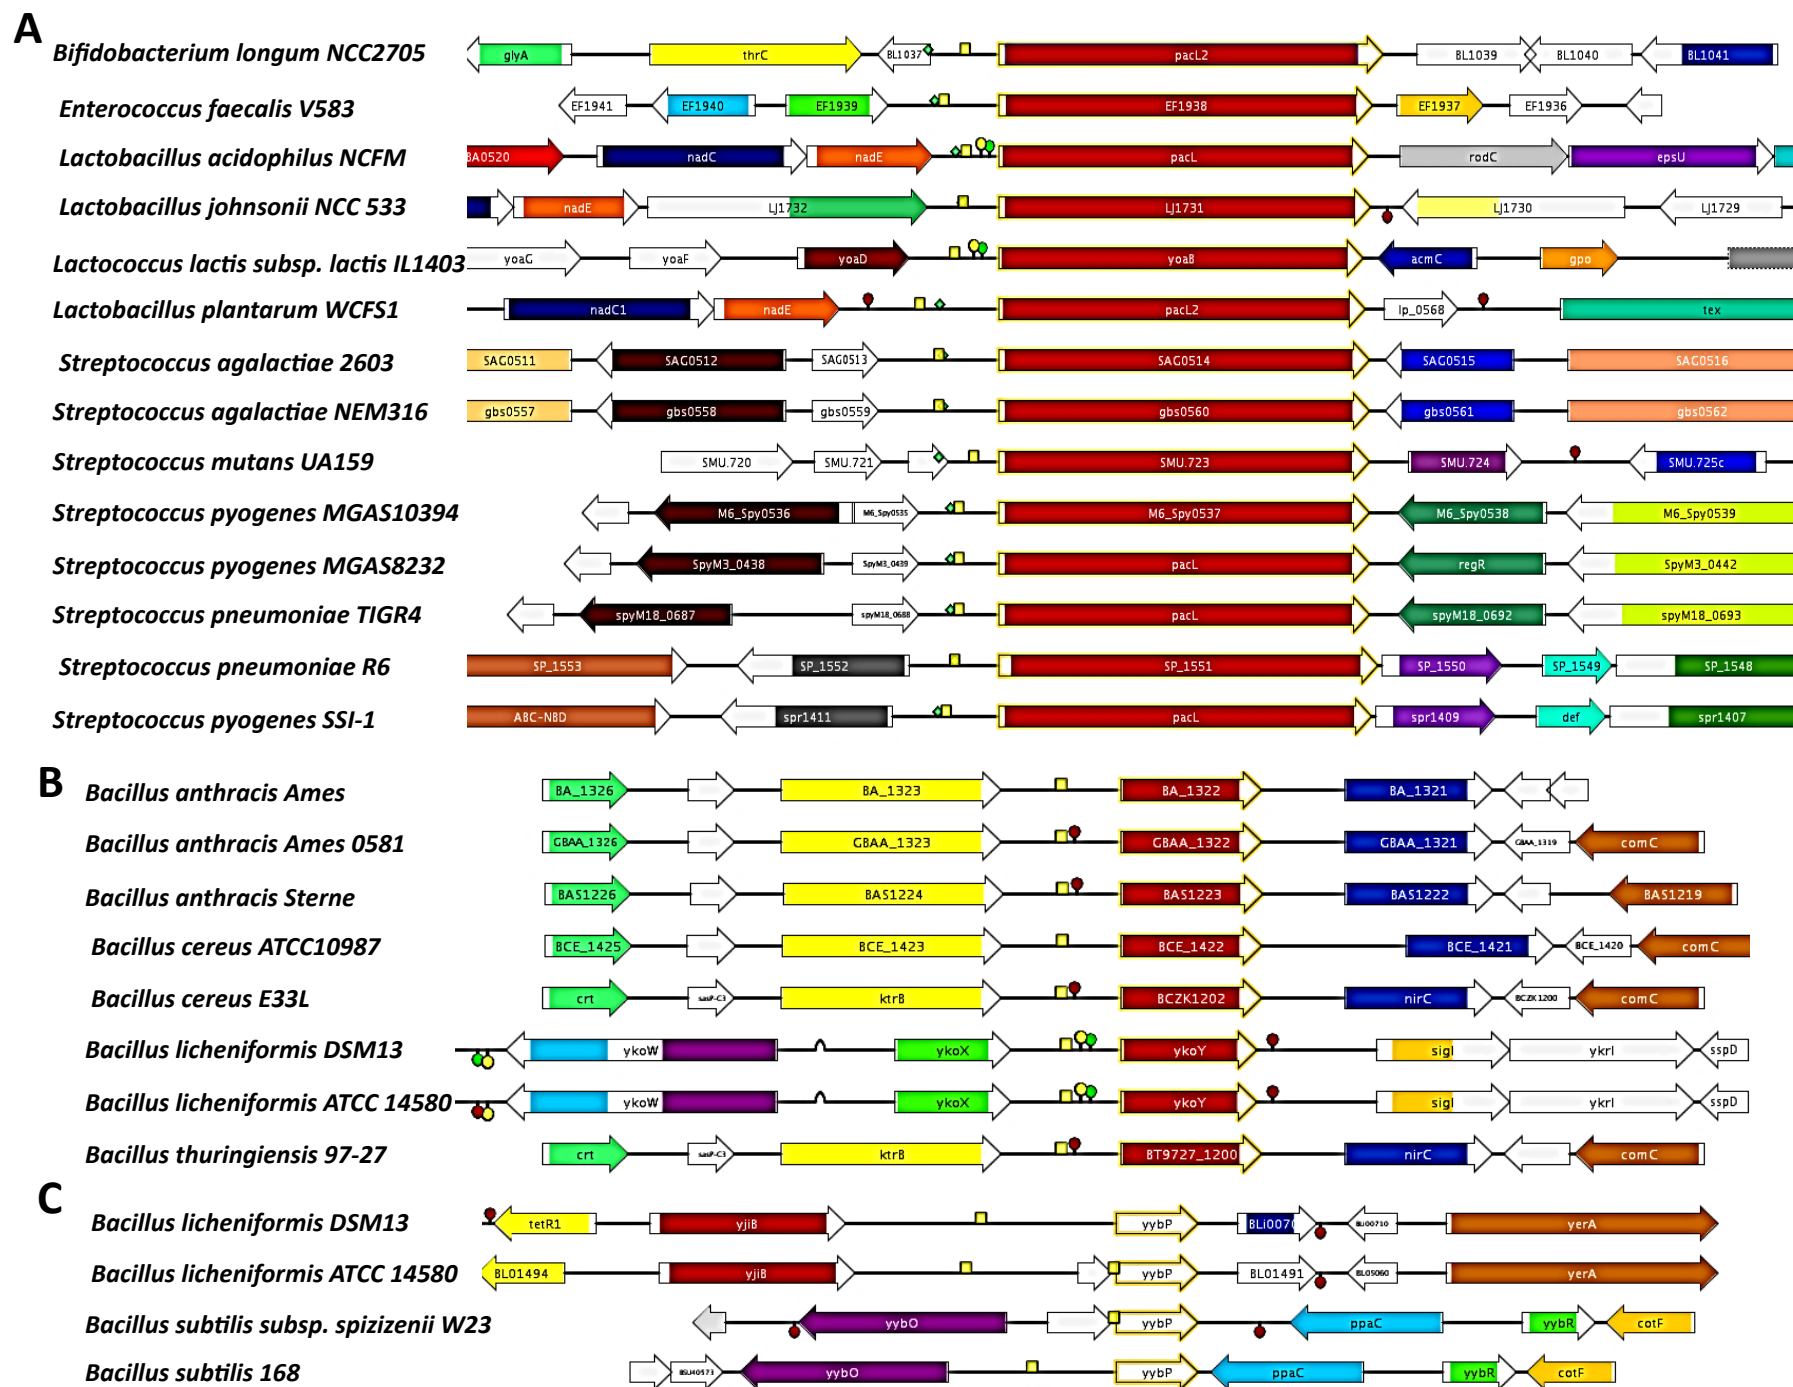

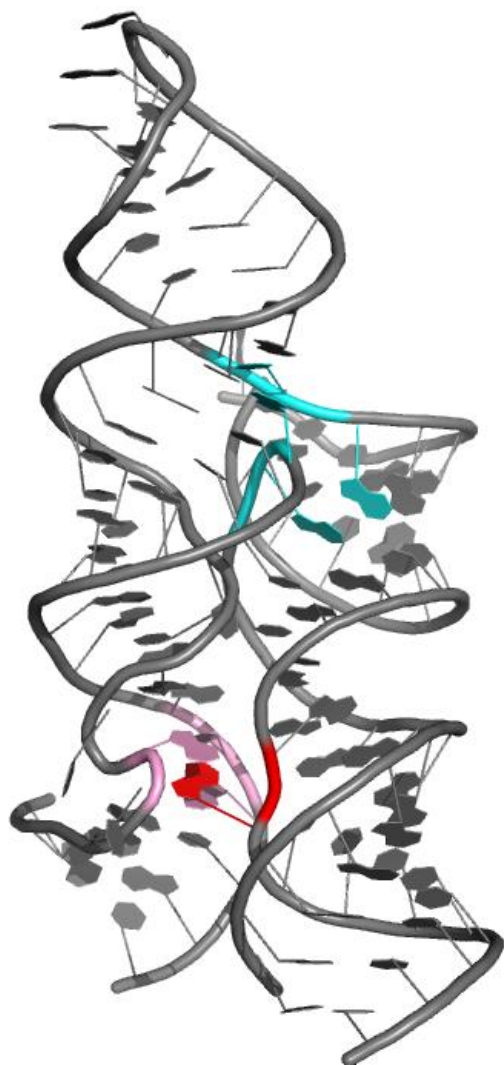

Hairpin ribozyme  
PDB ID: 1M5K

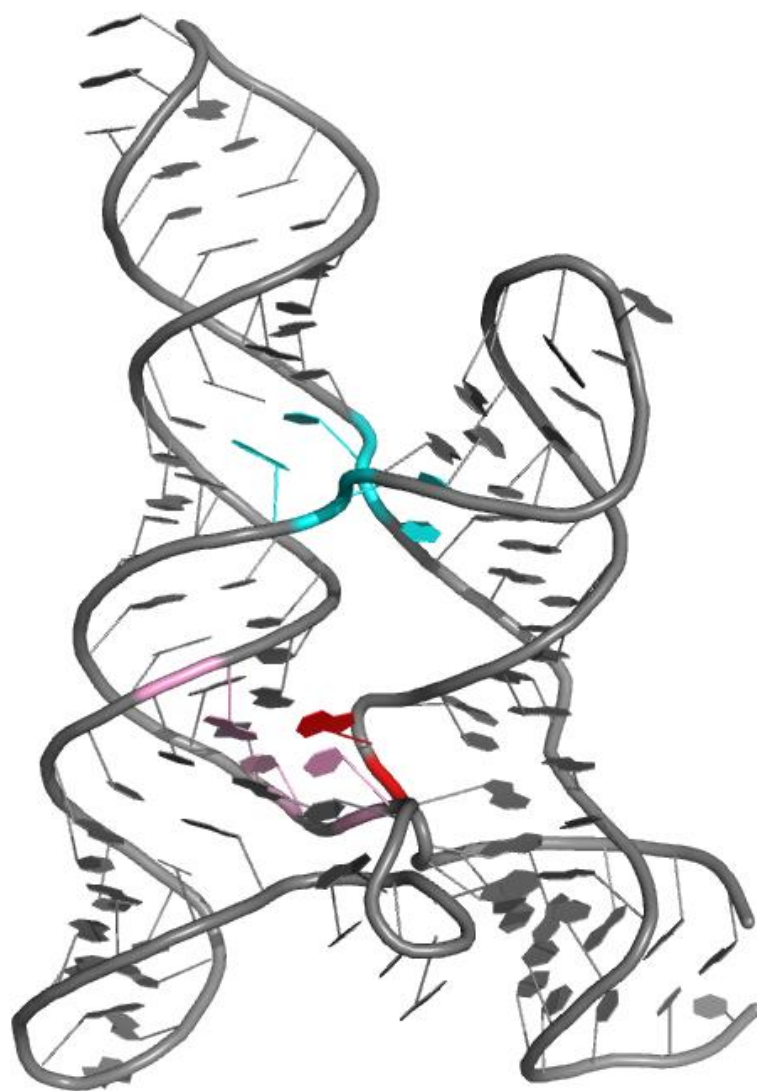

*L. Lactis* yybP-ykoY  
riboswitch

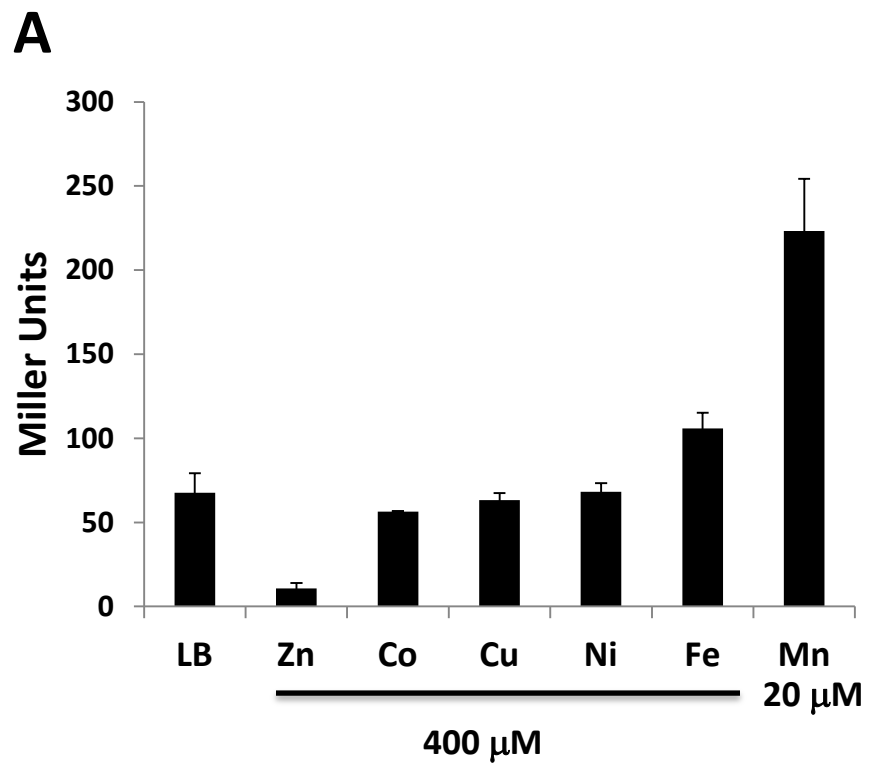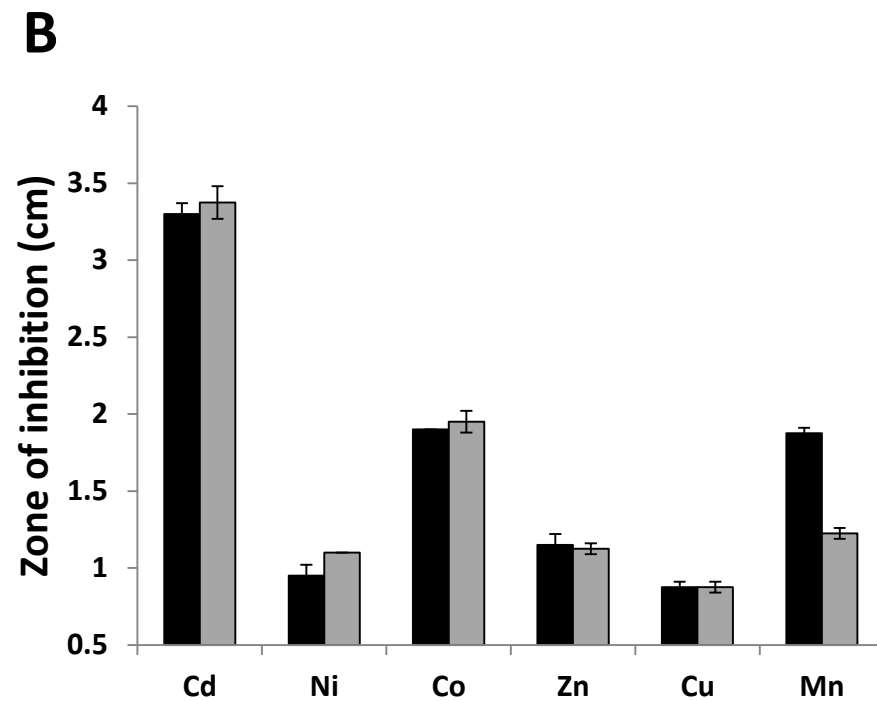

## Supplemental Figure Legends

**Figure S1, Experimental electron density of the Mn<sup>2+</sup>-bound *L. lactis* yybP-ykoY riboswitch structure, related to Figure 2.** A) Overall 2Fo-Fc electron density, contoured at 2.5  $\sigma$  level. The structure model is colored according to the secondary structure model in Figure 2. B) Sequence conservation in the *L. lactis* yybP-ykoY mapped on the 3D crystal structure. Residues over 96% conserved are colored in red, over 92% in orange, as reported by Rfam. These residues cluster around the docking interface, where two highly coordinated metal ions bind. C) 2Fo-Fc electron density for the M<sub>B</sub> site and M<sub>A</sub> site in the 100  $\mu$ M Mn<sup>2+</sup> structure, contoured at 4  $\sigma$  level. The metal-to-ligand distances (black dashed lines) and the A41 N6—U39 phosphoryl oxygen hydrogen bond (purple dashed line) are labeled. D) Close-up view of the cross-helix Type I A-minor motif interaction between A9 of L1 and C37-G60 of L3 in the *L. lactis* Mn<sup>2+</sup>-bound structure.

**Figure S2, Ba<sup>2+</sup> and Mn<sup>2+</sup> sites revealed by the anomalous data collection in the *L. lactis* yybP-ykoY structure, related to Figure 2.** in the presence of 2.5 mM Mn<sup>2+</sup>. A) The anomalous difference peaks (7  $\sigma$  contour level) at the Mn K-edge are shown in teal. Due to strong anomalous absorption of Ba at the Mn K-edge, these peaks could correspond to either Ba<sup>2+</sup> or Mn<sup>2+</sup>. The anomalous difference map far below the Mn K-edge (6  $\sigma$  contour level) is shown in red, these peaks correspond to Ba<sup>2+</sup> only. Metal identities were assigned based on this criteria as well as the metal-ligand distances, the assigned Ba<sup>2+</sup> ions are shown in black, Mn<sup>2+</sup> in magenta, and Mg<sup>2+</sup> in yellow. Note the absence of Ba anomalous signal at M<sub>A</sub> and M<sub>B</sub>, suggesting that only Mn occupy these sites. B) The anomalous difference map was calculated from diffraction data collected at peak of the Mn K-edge, and contoured at 9.5  $\sigma$ . Mn<sup>2+</sup> occupies both sites at 2.5 mM concentration.

**Figure S3, Conformation and metal-binding scheme in the *L. lactis* A40U mutant structure, related to Figure 3.** A) Conformation differences in the Mn<sup>2+</sup> sensing L3 loop between the two monomers in the asymmetric unit of the *L. lactis* A40U mutant structure. While the two monomers are similar in overall structure, the A42 residue in the L3 loop is stacked in monomer a (in orange), but flipped out in monomer b (in cyan). B) Anomalous difference map for the A40U mutant structure, collected at the Sr absorption edge, confirming Sr<sup>2+</sup> presence (at 7.5  $\sigma$ ). Mn contributes very little to anomalous scattering at this energy.

**Figure S4, Differences between the two monomers in the asymmetric unit of the Mn<sup>2+</sup>-free *E. coli* yybP-ykoY riboswitch structure, related to Figure 4.** Molecule B (gray), shown in other figures, is stabilized by crystal contacts, particularly at L3. Molecule A (colored by temperature B-factors, with blue being low and red being highly flexible) displays marked flexibility around P2, P4 and the L3 loop. P2 and P4 could not be completely placed in the electron density. Both *E. coli* apo molecules differ from the *L. lactis* structure in their L1-L3 docking regions.

**Figure S5, Gene context and organization of selected genes with upstream yybP-ykoY family riboswitches, related to Figure 5.** Searching using the key words yybP-ykoY yielded 240 hits that can be categorized into three groups. A) Genes encoding a putative P-type ATPase type IIA. B) *TerC* homolog *YkoY*. C) *YybP* and homologs. Few examples from each group were selected. The riboswitch aptamer is represented by a yellow box and putative terminators is represented by red circle and attenuators are represented by yellow and green circles. Analysis was done using Gene Context tool III (<http://operons.ibt.unam.mx/gct3/index.jsp>).



**Figure S6, Architectural similarity between the hairpin ribozyme and the *L. lactis* *yybP-ykoY* riboswitch, related to Figure 6.** Both RNAs contain a four-way-junction (cyan) and a distal cross-helix tertiary contact (light purple), mediated in part by a base flip-out (red). Major differences exist in the topology of strand cross-over at the four-way-junction, and a more extensive distal contact involving two dehydrated metal ions in the *yybP-ykoY* structure.

**Figure S7, *In vivo* confirmation of *yybP-ykoY* and YoaB metal selectivity, related to Figure 1F.** A) Induction of beta-galactosidase from an *L. lactis* *yoaB* leader region-lacZ fusion in a *B. subtilis* *mntR* mutant strain as monitored 60 min. after addition of various metals to the indicated concentrations. B) Sensitivity to various metals was monitored using a disk-diffusion (zone-of-inhibition) assay in the *B. subtilis* *mntR* Mn<sup>2+</sup>-sensitive mutant (gray) and *mntR* *P<sub>spac</sub>-yoaB*, which expresses *L. lactis* YoaB. Only Mn<sup>2+</sup> sensitivity was rescued by YoaB.

**Table S1. Sequences of the RNA constructs and DNA oligonucleotides used in this study.**

|                              |                                                                                                                                                                                                                                                                                                                                                       |
|------------------------------|-------------------------------------------------------------------------------------------------------------------------------------------------------------------------------------------------------------------------------------------------------------------------------------------------------------------------------------------------------|
| <b>IVT-Llac-WT</b>           | gcgtcagcattgatttatattacgaagaatattcgggattgtatttaaaatcaaagcgcttttagatc<br>aaatggaaagcatgaaacaucttatgggtgaaaacaaaagtgacatttggccatcttttatatg<br>atcatttACAAAGGGGAGTAGCGTCGGTAAGACCGAAACAAAGTCGT<br>CAATTCGTGAGATTCTCACCGGCTTTGTTGACATACTTATGTATGT<br>TTAGCAAGACCTTTGCCAGTTTTGATATCTGGCAGAGGTCTTTTTT<br>TGAAAACCTCTCATGATATCAGTTAGAAATAAAGGAGAATCATT<br>TG |
| <b>IVT-Llac-A40U</b>         | gcgtcagcattgatttatattacgaagaatattcgggattgtatttaaaatcaaagcgcttttagatc<br>aaatggaaagcatgaaacaucttatgggtgaaaacaaaagtgacatttggccatcttttatatg<br>atcatttACAAAGGGGAGTAGCGTCGGTAAGACCGAAACAAAGTCGT<br>CTATTCGTGAGATTCTCACCGGCTTTGTTGACATACTTATGTATGT<br>TTAGCAAGACCTTTGCCAGTTTTGATATCTGGCAGAGGTCTTTTTT<br>TGAAAACCTCTCATGATATCAGTTAGAAATAAAGGAGAATCATT<br>TG |
| <b>IVT-Llac-A40G</b>         | gcgtcagcattgatttatattacgaagaatattcgggattgtatttaaaatcaaagcgcttttagatc<br>aaatggaaagcatgaaacaucttatgggtgaaaacaaaagtgacatttggccatcttttatatg<br>atcatttACAAAGGGGAGTAGCGTCGGTAAGACCGAAACAAAGTCGT<br>CGATTCGTGAGATTCTCACCGGCTTTGTTGACATACTTATGTATGT<br>TTAGCAAGACCTTTGCCAGTTTTGATATCTGGCAGAGGTCTTTTTT<br>TGAAAACCTCTCATGATATCAGTTAGAAATAAAGGAGAATCATT<br>TG |
| <b>SHAPE-Llac-wt</b>         | ATAAGAATTCTAATACGACTCACTATAGGCCTTCGGGCCAACAAA<br>GGGGAGTAGCGTCGGTAAGACCGAAACAAAGTCGTCAATTCGTG<br>AGATTCTCACCGGCTTTGTTGACATACTTATGTATGTTTAGCAAGA<br>CCTTTGCCGATCCGGTTCGCCGGATCCAAATCGGGCTTCGGUCC<br>GGTTC                                                                                                                                              |
| <b>Llac-ykoy-cryst-1</b>     | TTAAAGaattcTAATACGACTCACTATAGAAAGGGGAGTAGCGTCGG<br>GAAACCGAAACAAAGTCGTCAATTCGTGAGGAAACTCACCGGCTT<br>TGTTGACATACGAAAGTATGTTTAGCAAGACCTTTCCGGGCGGCA<br>TGGTCCCAGCCTCCTGCTGGCGCCGCCTGGGCAACATTCCGAG<br>GGGACCGTCCCCTCGGTAATGGCGAATGGGACCg gatcc                                                                                                          |
| <b>Eco-ykoy-cryst-1</b>      | TTAAAGaattcTAATACGACTCACTATAGGATTTGGGGAGTAGCCGA<br>TTTCCGAAAGGAAATGTACGTGTCAACATACTCGTTGAAAAACGT<br>GGCACGTACGGACTGAAGAAATTCAGTCAGGCGAGACCATATCC<br>GGGCGGCATGGTCCCAGCCTCCTGCTGGCGCCGCCTGGGCAAC<br>ATTCCGAGGGGACCGTCCCCTCGGTAATGGCGAATGGGACCg gat<br>cc                                                                                               |
| <b>Llac-cryst-A40U</b>       | TTAAAGaattcTAATACGACTCACTATAGAAAGGGGAGTAGCGTCGG<br>GAAACCGAAACAAAGTCGTCTATTCGTGAGGAAACTCACCGGCTT<br>TGTTGACATACGAAAGTATGTTTAGCAAGACCTTTCCGGGCGGCA<br>TGGTCCCAGCCTCCTGCTGGCGCCGCCTGGGCAACATTCCGAG<br>GGGACCGTCCCCTCGGTAATGGCGAATGGGACCg gatcc                                                                                                          |
| <b>Lactis yoaB-R</b>         | GCgagatcTTAATGTTTTTCAAAAACGCCTTTA                                                                                                                                                                                                                                                                                                                     |
| <b>Lactis yoaB-F</b>         | CGCaagcTTAGAAATAAAGGAGAATCATTATG                                                                                                                                                                                                                                                                                                                      |
| <b>Lactis Mn ribo-lacZ-F</b> | CGCaagctTCGAGAAGCTATTAATTTATTAGA                                                                                                                                                                                                                                                                                                                      |
| <b>Lactis Mn ribo-lacZ-R</b> | CGCggaTCCTCTAAACTTCATTGACGGA                                                                                                                                                                                                                                                                                                                          |
